# Supplementary material
Source: PubMed Central journal article supplement (PMC7104299)
Supplement: pnas.1922778117.sapp.pdf [file pnas.1922778117.sapp.pdf]

## Supplementary Information for:

### Suppression of age-related salivary gland autoimmunity by glycosylation-dependent galectin-1-driven immune inhibitory circuits

Verónica C. Martínez Allo<sup>a</sup>, Vanesa Hauk<sup>b,1</sup>, Nicolás Sarbia<sup>a,1</sup>, Nicolás A. Pinto<sup>a</sup>, Diego O. Croci<sup>c</sup>, Tomás Dalotto-Moreno<sup>a</sup>, Rosa M. Morales<sup>a</sup>, Sabrina G. Gatto<sup>a</sup>, Montana N. Manselle Cocco<sup>a</sup>, Juan C. Stupirski<sup>a</sup>, Ángel Deladoey<sup>d</sup>, Esteban Maronna<sup>e</sup>, Priscila Marcaida<sup>f</sup>, Virginia Durigan<sup>f</sup>, Anastasia Secco<sup>f</sup>, Marta Mamani<sup>f</sup>, Alicia Dos Santos<sup>d</sup>, Antonio Catalán Pellet<sup>f</sup>, Claudia Pérez Leiros<sup>b</sup>, Gabriel A. Rabinovich<sup>a, g, 2,3</sup> and Marta A. Toscano<sup>a, 2,3</sup>

<sup>a</sup>Laboratorio de Inmunopatología. Instituto de Biología y Medicina Experimental (IBYME). Consejo Nacional de Investigaciones Científicas y Técnicas (CONICET), C1428, Ciudad de Buenos Aires, Argentina.

<sup>b</sup>Instituto de Química Biológica de la Facultad de Ciencias Exactas y Naturales (IQUIBICEN), CONICET, Universidad de Buenos Aires, C1428, Ciudad de Buenos Aires, Argentina.

<sup>c</sup>Instituto de Histología y Embriología de Mendoza (IHEM-CONICET), Facultad de Ciencias Exactas y Naturales, Universidad Nacional de Cuyo, CONICET, C5500, Mendoza, Argentina.

<sup>d</sup>División de Patología, Hospital Bernardino Rivadavia, C1425, Ciudad de Buenos Aires, Argentina.

<sup>e</sup>Servicio de Patología, Sanatorio Mater Dei, C1425, Ciudad de Buenos Aires, Argentina.

<sup>f</sup>División de Reumatología, Hospital Bernardino Rivadavia, C1425, Ciudad de Buenos Aires, Argentina.

<sup>g</sup>Facultad de Ciencias Exactas y Naturales, Universidad de Buenos Aires, C1428, Ciudad de Buenos Aires, Argentina.

<sup>1</sup>V.H. and N.S. contributed equally to this work.

<sup>2</sup>G.A.R. and M.A.T. contributed equally to this work.

<sup>3</sup>To whom correspondence may be addressed. E-mails: gabyrabi@gmail.com or martalitos@gmail.com.

#### This PDF file includes:

Supplementary Fig. 1

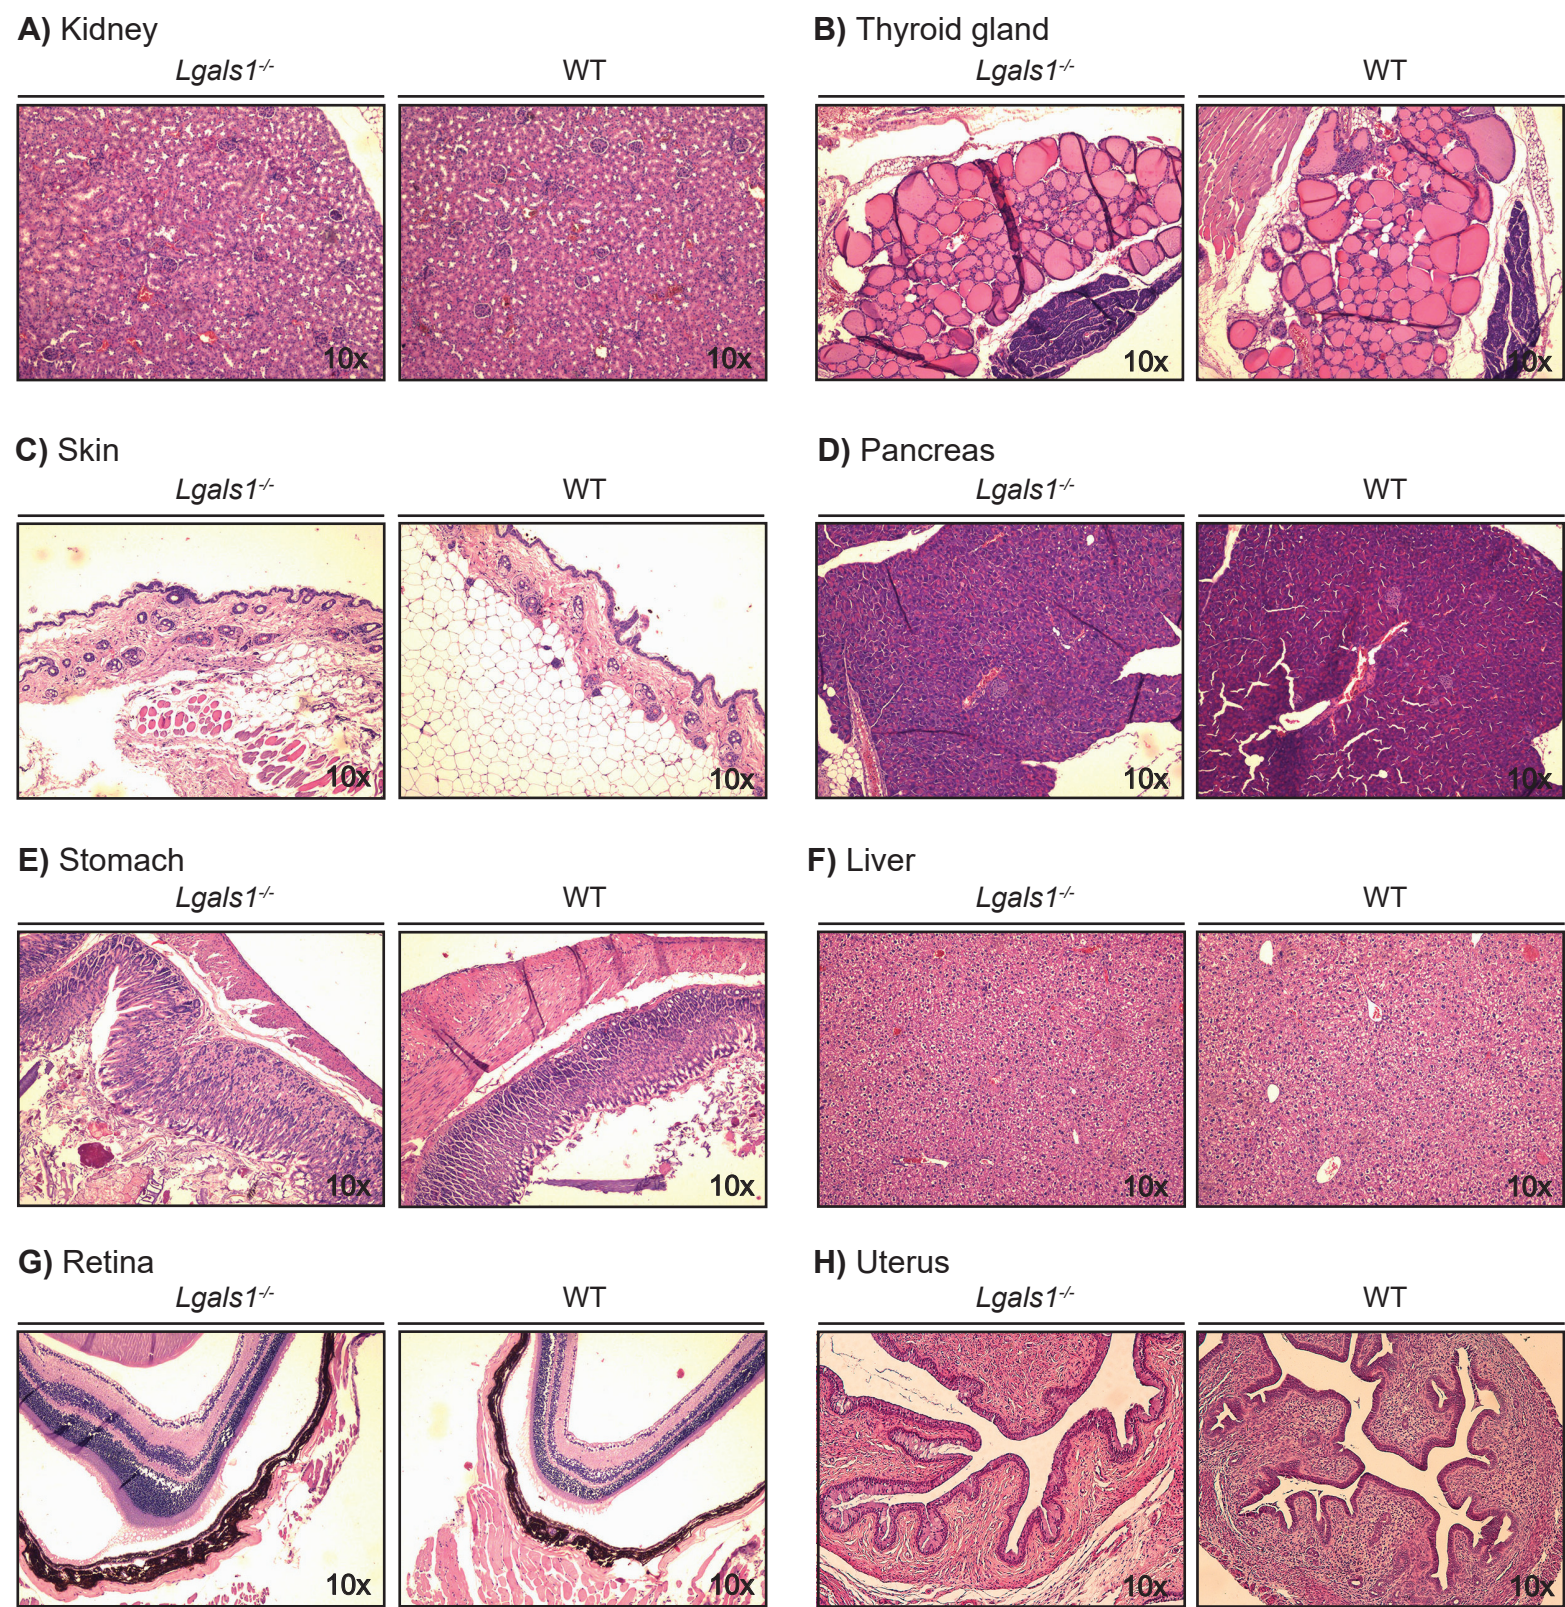

**Supplementary Figure 1.** Representative images of tissue sections (H&E) of kidney (A), thyroid gland (B), skin (C), pancreas (D), stomach (E), liver (F), retina (G) and uterus (H) from aged ( $\geq 9$  mo) *Lgals1<sup>-/-</sup>* and WT mice, revealing no significant tissue damage.
